# Supplementary material for: Photochromic inorganic–organic complex derived from low-cost deep eutectic solvents with tunable photocurrent responses and photocatalytic properties
Source: Royal Society of Chemistry journal article supplement (doi:10.1039/c9ce01727e), 2019-12-26
Supplement: c9ce01727e1.pdf [file c9ce01727e1.pdf]

Supporting Information

**Photochromic Inorganic-Organic Complex Derived from Low-cost Deep  
Eutectic Solvents with Tunable Photocurrent responses and Photocatalytic  
Properties**

Junbiao Wu,<sup>†a</sup> Luqi Lou,<sup>†a</sup> Huaying Sun,<sup>a</sup> Chuanyao Tao,<sup>b</sup> Teng Li,<sup>c</sup> Zhuopeng  
Wang,<sup>\*a</sup> Xia Zhang<sup>\*a</sup> and Jiyang Li<sup>\*b</sup>

- a. *Department of Chemistry, College of Sciences, Northeastern University, Shenyang, Liaoning 110819, China. Email: [wangzhuopeng@mail.neu.edu.cn](mailto:wangzhuopeng@mail.neu.edu.cn); [xzhang@mail.neu.edu.cn](mailto:xzhang@mail.neu.edu.cn); Tel.: +86-024-83684533; Fax: +86-024-83684533.*
- b. *State Key Laboratory of Inorganic Synthesis and Preparative Chemistry, College of Chemistry, Jilin University, Changchun 130012, P. R. China. E-mail: [lijiyang@jlu.edu.cn](mailto:lijiyang@jlu.edu.cn); Tel: (+86) 431 8516-8608; Fax: (+86) 431 8516-8608.*
- c. *State Key Laboratory of Coal Conversion, Institute of Coal Chemistry, Chinese Academy of Sciences, Taiyuan, 030001, China.*

<sup>†</sup> *These authors contributed equally.*

**Table S1.** Crystal data and structure refinement for  $[\text{C}_{10}\text{H}_{10}\text{N}_2][\text{GaF}(\text{C}_2\text{O}_4)_2]$ .

|                                                              |                                                                 |
|--------------------------------------------------------------|-----------------------------------------------------------------|
| Empirical formula                                            | $\text{C}_{14}\text{H}_{10}\text{FGaN}_2\text{O}_8$             |
| Formula weight                                               | 422.96                                                          |
| Temperature                                                  | 293(2) K                                                        |
| Wavelength(Å)                                                | 0.71073                                                         |
| Crystal system, space group                                  | Monoclinic, C2/m                                                |
| Unit cell dimensions                                         |                                                                 |
| <i>a</i> (Å)                                                 | 18.4449(10)                                                     |
| <i>b</i> (Å)                                                 | 10.4561(5)                                                      |
| <i>c</i> (Å)                                                 | 3.8127(2)                                                       |
| <i>α</i> (deg)                                               | 90                                                              |
| <i>β</i> (deg)                                               | 93.617(2)                                                       |
| <i>γ</i> (deg)                                               | 90                                                              |
| Volume(Å <sup>3</sup> )                                      | 733.86(7)                                                       |
| Z, calculated density(mg m <sup>-3</sup> )                   | 2,1.914                                                         |
| Absorption coefficient(mm <sup>-1</sup> )                    | 1.940                                                           |
| <i>F</i> (000)                                               | 424                                                             |
| Crystal size(mm <sup>3</sup> )                               | 0.245 × 0.123 × 0.104                                           |
| <i>θ</i> range(°) for data collection                        | 3.85–27.456                                                     |
| Limiting indices                                             | $-23 \leq h \leq 23, -13 \leq k \leq 13, -4 \leq l \leq 4$      |
| Reflections collected/unique                                 | 5805/ 882, [ <i>R</i> (int) = 0.0248]                           |
| Completeness to <i>θ</i> (%)                                 | 25.242, 99.4                                                    |
| Absorption correction                                        | semi-empirical from equivalents                                 |
| Refinement method                                            | full-matrix least-squares on <i>F</i> <sup>2</sup>              |
| Data/restraints/parameters                                   | 882/6/67                                                        |
| Goodness-of-fit on <i>F</i> <sup>2</sup>                     | 1.167                                                           |
| Final <i>R</i> indices [ <i>I</i> > 2 <i>σ</i> ( <i>I</i> )] | <i>R</i> <sub>1</sub> = 0.0272, <i>wR</i> <sub>2</sub> = 0.0680 |
| <i>R</i> indices (all data)                                  | <i>R</i> <sub>1</sub> = 0.0272, <i>wR</i> <sub>2</sub> = 0.0680 |
| Largest diff. peak and hole (eÅ <sup>-3</sup> )              | 0.534 and -0.496                                                |

---

$$^a R_1 = \sum(\Delta F / \sum(F_o)), wR_2 = (\sum[w(F_o^2 - F_c^2)]) / \sum[w(F_o^2)^2]^{1/2} \text{ and } w = 1 / [\sigma^2(F_o^2) + (0.0595P)^2 + 2.8937P] \text{ where } P = (F_o^2 + 2F_c^2) / 3$$

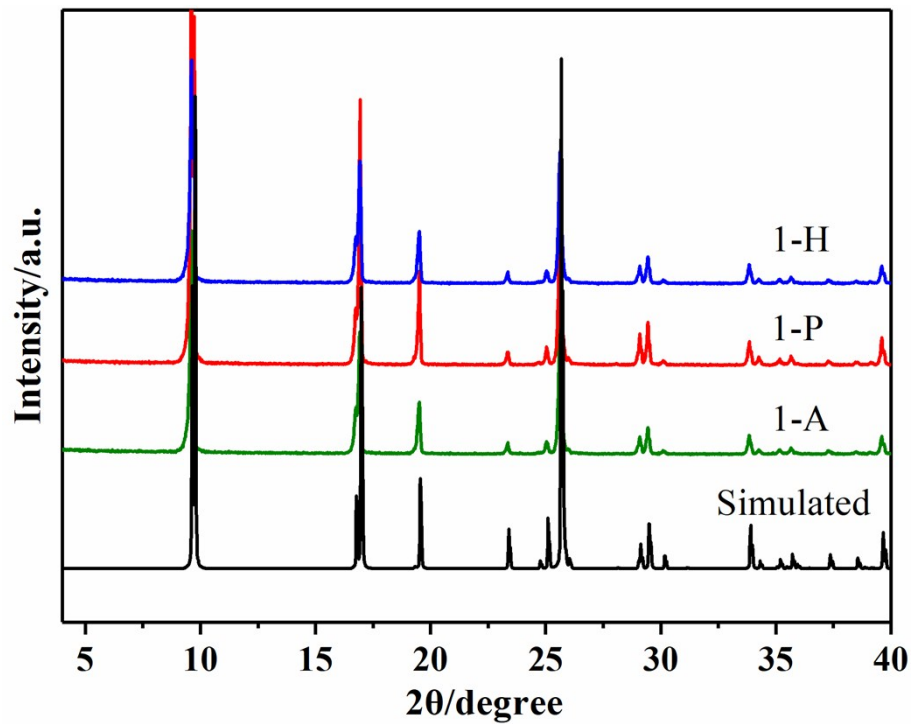

Figure S1. PXRD pattern of  $[\text{C}_{10}\text{H}_{10}\text{N}_2][\text{GaF}(\text{C}_2\text{O}_4)_2]$ .

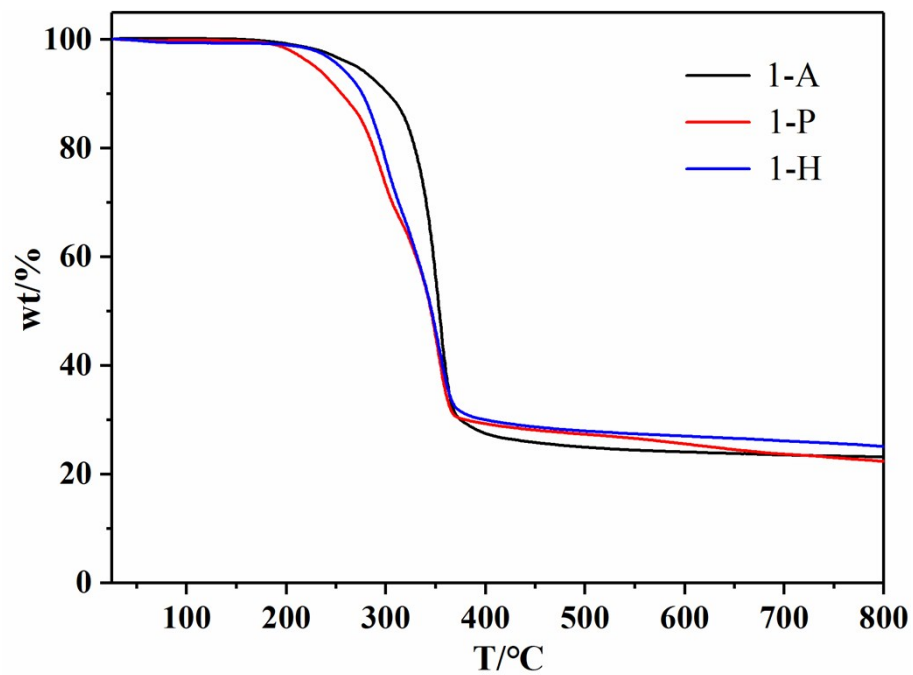

Figure S2. TG curve of  $[\text{C}_{10}\text{H}_{10}\text{N}_2][\text{GaF}(\text{C}_2\text{O}_4)_2]$ .

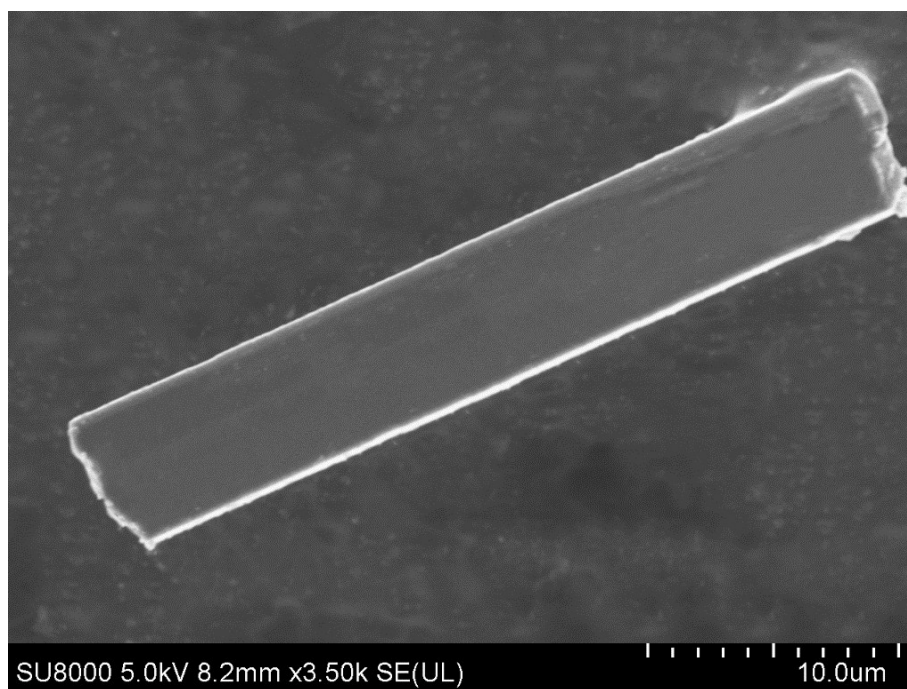

Figure S3. SEM image of  $[\text{C}_{10}\text{H}_{10}\text{N}_2][\text{GaF}(\text{C}_2\text{O}_4)_2]$ .

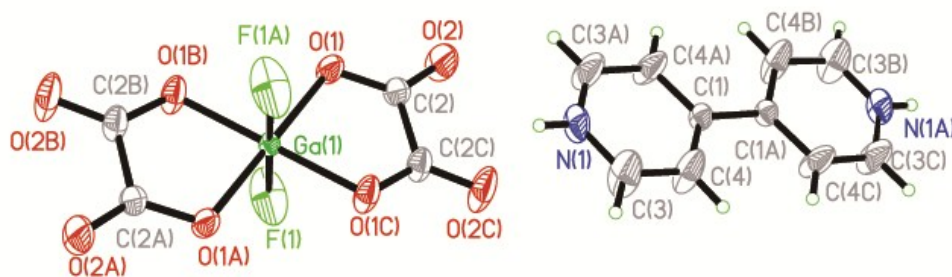

Figure S4. Thermal ellipsoids of  $[\text{C}_{10}\text{H}_{10}\text{N}_2][\text{GaF}(\text{C}_2\text{O}_4)_2]$  given at 50% probability, showing the atomic labelling scheme.

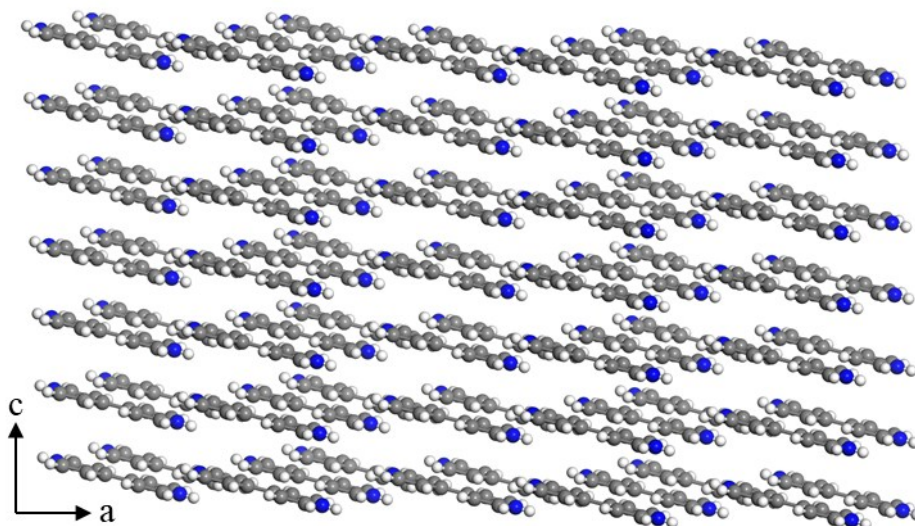

**Figure S5.** Dense packing mode of  $\text{H}_2\text{bpy}^{2+}$  cations along the [010] direction displaying the  $\pi-\pi$  stacking interactions between the adjacent pyridinium rings of the  $\text{H}_2\text{Bpy}^{2+}$  dications.

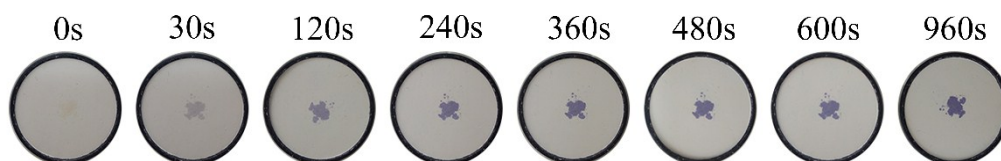

**Figure S6.** Colourless to purple upon light irradiation (48W UV light)

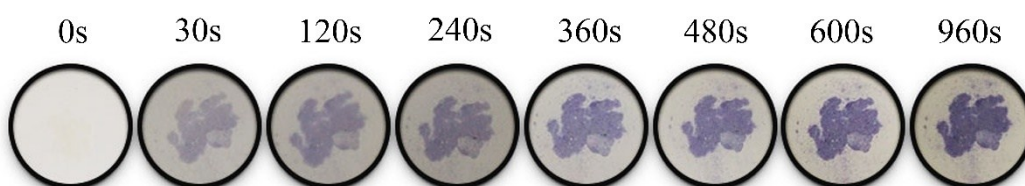

**Figure S7.** Colourless to purple upon light irradiation (300W visible light)

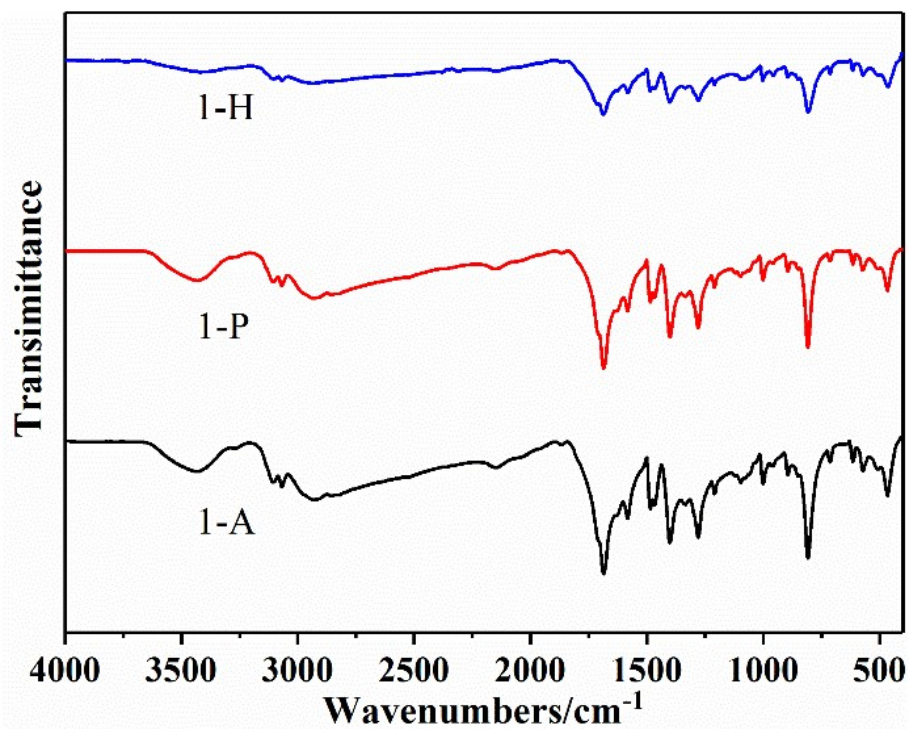

Figure S8. IR curves of  $[\text{C}_{10}\text{H}_{10}\text{N}_2][\text{GaF}(\text{C}_2\text{O}_4)_2]$ .

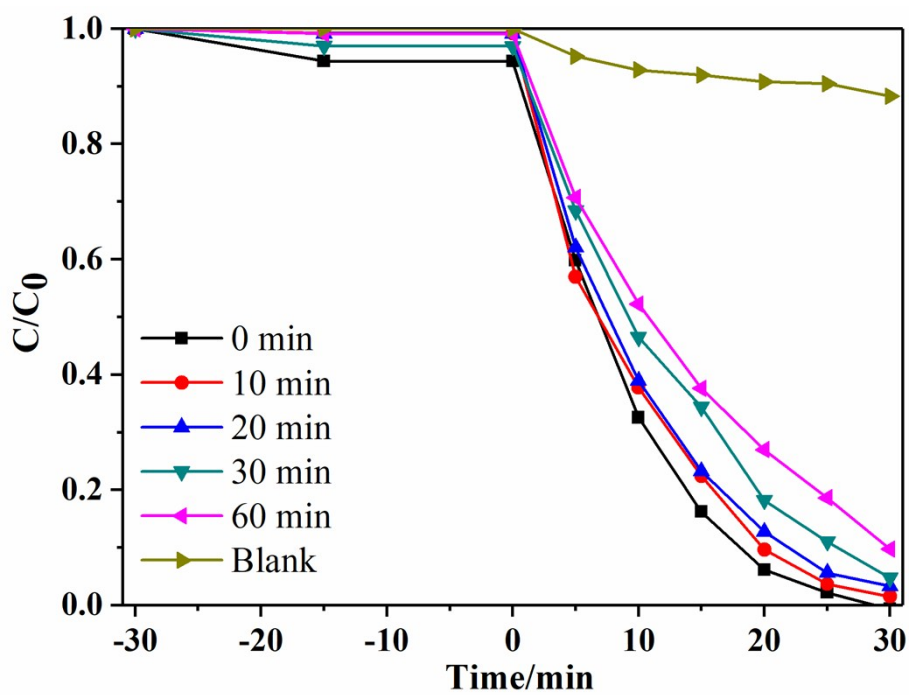

Figure S9. Photocatalytic degradation curves (under UV light)

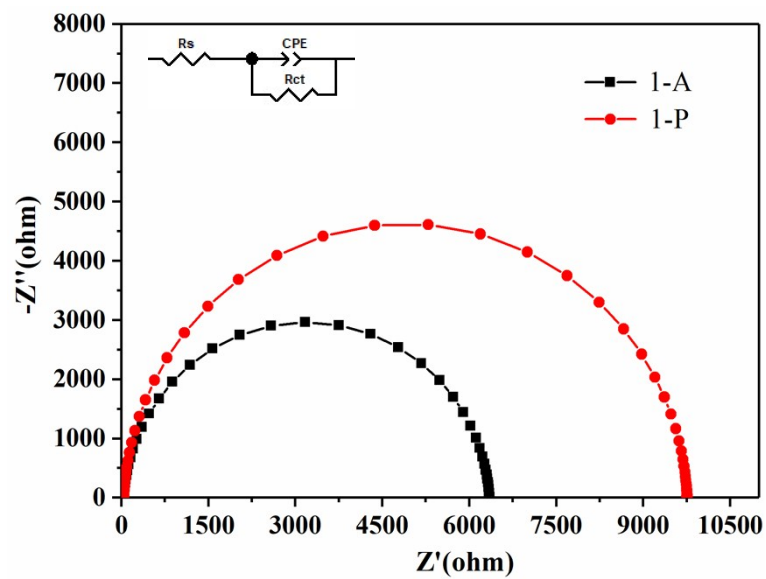

Figure S10. Nyquist impedance plots the corresponding equivalent circuit of 1-A and 1-P.

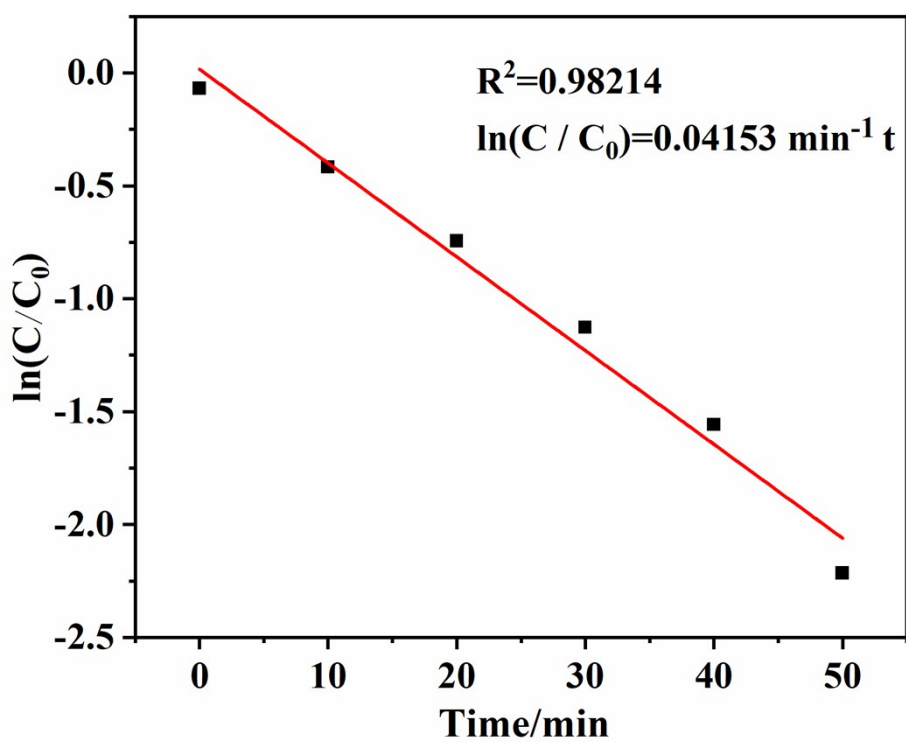

Figure S11. Linear relationship between  $\ln(C_0/C)$  and irradiation time for photodegradation of RhB over 1-A.



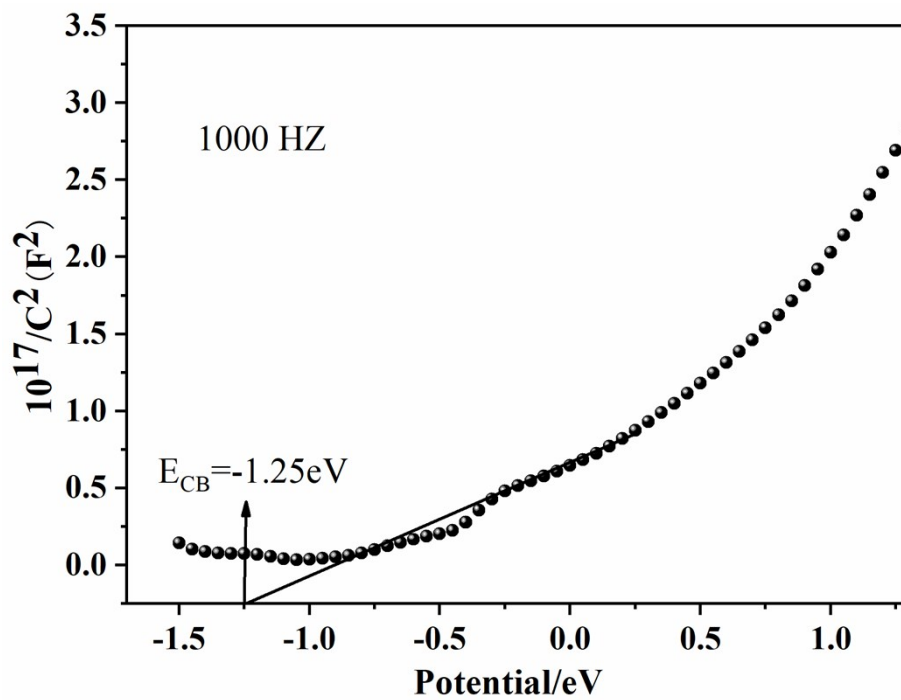

Figure S12. Mott-Schottky plot of 1-A.

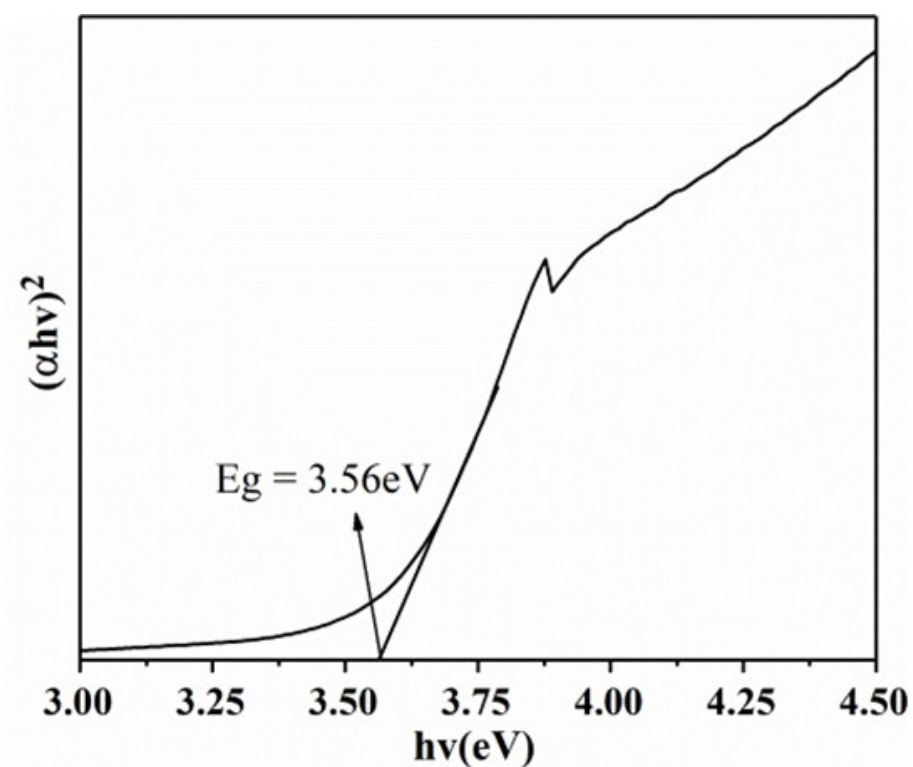

Figure S13. Plot of  $(\alpha hv)^2$  as a function of  $hv$  for the bandgap energy of 1-A, exhibiting its bandgap energy estimated to be 3.56 eV.



Table S2 Summary of photochromic performances in this work compared with literatures

| Entry | sample name                       | Light sources       | Irradiation intensity | Response time | Color transformation        | Bleach condition                  | Ref |
|-------|-----------------------------------|---------------------|-----------------------|---------------|-----------------------------|-----------------------------------|-----|
| 1     | [C12H14N2][Zn6(PO4)4(HPO4)(H2O)2] | UV light            | -                     | several hours | colorless to blue           | 230°C for 1 h in air.             | 1   |
| 2     | [Cd(CEbpy)(m-BDC)(DMF)]·2H2O      | UV light            | 175W                  | 2min          | yellow to darker blue       | 140°C for 4 ~ 6 h .               | 2   |
| 3     | [Zn(HPO3)(4,4'-bipy)0.5]          | Xe lamp             | 300W                  | >3min         | colorless to pink           | 145°C for 2 hours in air.         | 3   |
| 4     | [Zn(bcbpy)0.5(pma)0.5(H2O)]·3H2O  | UV light            | 300W                  | 5s            | colorless to blue           | 50°C for 20 min in air.           | 4   |
| 5     | (MV)Bi2Cl8                        | UV light            | -                     | -             | Yellow to black             | 130°C in air                      | 5   |
| 6     | [Zn2(Bpy)(CTA)4]                  | Xe lamp             | 300W                  | -             | colorless to purple         | 130°C for 2h in air.              | 6   |
| 7     | [Cd1.5(H2L)0.5(Cl)3(CH3OH)]n      | Xe lamp             | 300W                  | a few minutes | pale yellow to blue         | 120°C for 20 min in air.          | 7   |
| 8     | [Mg2(1,4-NDC)2(H2O)2](bpy)(H2O)4  | Xe lamp             | 500W                  | 10min         | colourless to blue          | 60°C for 20 min.                  | 8   |
| 9     | [Zn(HCOO)2(4,4'-bipy)]            | Xe lamp             | 300 W                 | -             | pale yellow to olive green  | 120°C for 2h.                     | 9   |
| 10    | Eu2(m-BDC)4(MV)                   | Xe lamp or sunlight | -                     | -             | brown to green              | -                                 | 10  |
| 11    | [H2CPBPY]·[H2BTEC]                | Xe lamp             | 150 W                 | -             | pale yellow to green        | 130°C in air.                     | 11  |
| 12    | TbMOF                             | Xe lamp             | 300 W                 | -             | bright yellow to dark green | 120°C for 1h in air.              | 12  |
| 13    | [Cd(CPBPY)(m-BDC)·H2O             | Xe lamp             | -                     | -             | yellow to blue              | 120°C                             | 13  |
| 14    | (hMV)[Bi(hMV)Cl5]                 | Hg UV lamp          | 150 W                 | a few minutes | white to blue               | 120°C for few minutes.            | 14  |
| 15    | [Cd(CPBPY)(o-BDC)(H2O)]·H2O       | UV light            | -                     | -             | yellow to gray              | exposed to pure O2 or air, return | 15  |

|    |                                          |                               |       |                 |                           |                              |           |
|----|------------------------------------------|-------------------------------|-------|-----------------|---------------------------|------------------------------|-----------|
| 16 | [Zn(L1)(L3)0.5]-H2O                      | Xe lamp                       | 250 W | 20s             | pale yellow to pale green | slowly.<br>130 °C for 5 min. | 16        |
| 17 | {[Zn3(Cebpy)2(Hbtc)(H2btc)2(OH)2]-4H2O}n | Xe lamp                       | -     | 10min saturated | pale yellow to dark blue  | 80 °C for 2 hours.           | 17        |
| 18 | NTHU-9                                   | X-rays                        | -     | -               | orange to slate gray      | 200°C for 12h in air.        | 18        |
| 19 | [H2(Bpy)][H3(Pma)]2                      | Xe lamp                       | 300 W | -               | yellow to grayish purple  | 80 °C for 3 min.             | 19        |
| 20 | [Cd2(ic)(mc)(4,4'-bipy)3]n·4nH2O         | light with $\lambda < 460$ nm | -     | -               | yellow to blue            | 80°C for several hours.      | 20        |
| 21 | [C10H10N2][GaF(C2O4)2]                   | UV light                      | 48W   | 10s             | colorless to purple       | 110°C for 30 min.            | This work |

- 1 J. B. Wu, Y. Yan, J. Y. Li and J. H. Yu, *Chem. Commun.*, 2013, **49**, 4995.
- 2 J. J. Liu, J. Li and W. B. Lu, *RSC Adv.*, 2019, **9**, 33155.
- 3 B. D. Ge, Y. Han, S. D. Han and G.M. Wang, *Inorg. Chem. Front.*, 2019, **6**, 2435.
- 4 L. Li, Z. M. Tu, Y. Hua and H. Zhang, *Inorg. Chem. Front.*, 2019, **6**, 3077.
- 5 G. Xu, G. C. Guo, M. S. Wang and J. S. Huang, *Angew. Chem.*, 2007, **119**, 3313.
- 6 J. Liu, P. X. Li, H. Y. Zeng and G. C. Guo, *RSC Adv.*, 2017, **7**, 34901.
- 7 L. K. Li, H. Y. Li, T. Li, F. A. Li and S.Q. Zang, *CrystEngComm.*, 2018, **20**, 6412.
- 8 Z. F. Wu, B. Tan, Z. L. Xie and X. Y. Huang, *J. Mater. Chem. C.*, 2016, **4**, 2438.
- 9 C. J. Zhang, Z. Wei. Chen, M. S.Wang and G. C. Guo, *Inorg. Chem.*, 2014, **53**, 847.
- 10 H. J. Chen, G. M. Zheng, M. Li and Z. Y. Fu, *Chem. Commun.*, 2014, **50**, 13544.
- 11 H. J. Chen, M.Li, G. M. Zheng, Z. Y. Fu and J. C. Dai, *RSC Adv.*, 2014, **4**, 42983.
- 12 H. Y. Li, Y.L.Wei, S.Q. Zang and Thomas C. W. Mak, *Chem. Mater.*, 2015, **27**, 1327.
- 13 Y. Tan, Z. Y. Fu, Y. Zeng, J. Zhang and J. C. Dai, *J. Mater. Chem.*, 2012, **22**, 17452.
- 14 Oksana Toma, Nicolas Mercier, and Chiara Botta, *Eur. J. Inorg. Chem.*, 2013, **7**, 1113.
- 15 S. L. Li, M. Han, B. Wu, and X. M. Zha, *Cryst. Growth Des.*, 2018, **18**, 3883.
- 16 W. Q. Kan, S. Z.Wen, Y. C. He and C. Y. Xu, *Inorg. Chem.*, 2017, **56**, 14926.
- 17 Q. Shi, S. Yu Wu, X. T. Qiu, Y. Q. Sun and S. T. Zheng, *Dalton Trans.*, 2019, **48**, 954.
- 18 P.-C. Jhang, N.-T. Chuang and S.-L. Wang, *Angew. Chem. Int. Ed.*, 2010, **122**, 4296.
- 19 Z.-W. Chen, G. Lu, P.-X. Li, R.-G. Lin, L.-Z. Cai, M.-S. Wang and G.-C. Guo, *Cryst. Growth Des.*, 2014, **14**, 2527.
- 20 M. S.Wang, G. C. Guo, G. Xu and J. S. Huang, *Angew. Chem.*, 2008, **120**, 3621.
